# Supplementary material for: Evolutionary Dynamics of Avian Influenza Viruses Isolated from Wild Birds in Moscow
Source: MDPI journal article supplement (doi:10.3390/ijms24033020), 2023-02-03
Supplement: s1 [file s1]

Tree scale: 0.1

A/duck/Tsukuba/672/07 H4N6  
A/duck/East Java/Av682/2016/H4N6  
A/duck/Shiga/8/2004 H4N6  
A/pochard/Buryatiya/1941/2000 H4N6  
A/duck/Sweden/7582/2003 H4N6  
A/duck/mallard duck/Netherlands/3/2004 H4N6  
A/bewicks swan/Netherlands/3/2007 H4N6  
A/Mallard/Netherlands/09014545/2009 H4N6  
A/dunlin/Sweden/1/2005 H4N6  
A/mallard/Sweden/5763/2005 H4N6  
A/mallard/Sweden/52484/2006 H4N6  
A/mallard/Sweden/68836/2007 H4N6  
A/mallard/Sweden/60043/2007 H4N6  
A/budgerigar/Hokkaido/1/77 H4N6  
A/duck/Hong Kong/365/1978 H4N6  
A/duck/Czech Republic/1/1956 H4N6  
A/mallard/Sweden/81019/2008 H4N6  
A/mallard/Sweden/622/2002 H4N6  
A/wild bird/Korea/YJ117/2007 H4N6  
A/mallard/South Korea/N08-0188/2008 H4N6  
A/duck/Hokkaido/W150/2014 H4N6  
A/pochard/Fukui/131816/2013 H4N6  
A/duck/Chiba/121217/2012 H4N6  
A/duck/Zhejiang/S2088/2011 H4N6  
A/wild waterfowl/Korea/8/2011 H4N6  
A/duck/Shanghai/46-2/2009 H4N6  
A/duck/Chiba/8/2008 H4N6  
A/duck/Tsukuba/56/2009 H4N6  
A/Duck/Jiangxi/24831/2014 H4N6  
A/duck/Mongolia/183/2010 H4N6  
A/duck/Mongolia/689/2010 H4N6  
A/duck/Moscow/4643/2011 H4N6  
A/mallard/Moscow/4518/2011 H4N6  
A/mallard duck/Netherlands/7/2011 H4N6  
A/mallard duck/Netherlands/26/2010 H4N6  
A/mallard duck/Netherlands/35/2015 H4N6  
A/duck/Mongolia/118/2015 H4N6  
A/Mallard/South Korea/KNU2019-42/2019 H4N6  
A/mallard/Sweden/102250/2009 H4N6  
A/mallard/Sweden/101640/2009 H4N6  
A/mallard/Czech Republic/13579-84K/2010 H4N6  
A/duck/Moscow/3799/2009 H4N6  
A/duck/Moscow/3740/2009 H4N6  
A/Mallard/Netherlands/13012202/2013 H4N6  
A/mallard/Moscow/3661/2008 H4N6  
A/mallard duck/Netherlands/22/2011 H4N6  
A/mallard/Netherlands/89/2017 H4N6  
A/mallard/Netherlands/27/2017 H4N6  
A/duck/Moscow/4641/2011 H4N6  
A/mallard/Moscow/4528/2011 H4N6  
A/duck/Moscow/4781/2012 H4N6  
A/mallard/Moscow/4843/2012 H4N6  
A/mallard/Moscow/4771/2012 H4N6  
A/mallard duck/Georgia/3/2016 H4N6  
A/Anas platyrhynchos/Belgium/8535/2016 H4N6  
A/duck/Hunan/S1012/2009 H4N6  
A/duck/Yunnan/YN-1/2011 H4N6  
A/teal/Chany Lake/106 cloaca/2012 H4N6  
A/duck/Mongolia/262/2011 H4N6  
A/duck/Bangladesh/25891/2015 H4N6  
A/duck/Bangladesh/36395/2018 H4N6  
A/mallard/Novosibirsk region/3344k/2020 H4N6  
A/mallard/Russia Primorje/88T/2020 H4N6  
A/duck/Bangladesh/18D725/2016 H4N6  
A/Anas platyrhynchos/Belgium/281 001/2020 H4N6  
A/duck/Bangladesh/1521/2009 H4N6  
A/swan/Hokkaido/481109/2017 H4N6  
A/common teal/Amur region/94b/2020 H4N6  
A/duck/Mongolia/690/2019 H4N6  
A/teal/Buryatia/57/2018 H4N6  
A/mallard/South Korea/JB42-113/2020 H4N6  
A/duck/Mongolia/374/2018 H4N6  
A/duck/Mongolia/447/2018 H4N6  
A/duck/Bangladesh/50190/2021 H4N6  
A/Common Teal/Dagestan/34d/2019 H4N6  
A/Shoveler/Omsk Region/15/2019 H4N6  
A/duck/Bangladesh/37516/2019 H4N6  
A/mallard/Novosibirsk region/3449k/2020 H4N6
