# Supplementary material for: Evolutionary Dynamics of Avian Influenza Viruses Isolated from Wild Birds in Moscow
Source: MDPI journal article supplement (doi:10.3390/ijms24033020), 2023-02-03
Supplement: s1 [file s1]

**Table S1.** List of viruses with completely sequenced genome

| Isolation date | Virus                       | Designation      | Subtype      | Accession Numbers                  |
|----------------|-----------------------------|------------------|--------------|------------------------------------|
| 04.10.2006     | A/gull/Moscow/3100/06       | g/3100/06        | H6N2         | EU152234- EU152241                 |
| 13.10.2008     | A/duck/Moscow/3554/2008     | d/3554/08        | H3N1         | GU991376                           |
| 13.10.2008     | A/duck/Moscow/3556/2008     | d/3556/08        | H3N1         | MN692225- MN692232                 |
| 21.10.2008     | A/duck/Moscow/3661/2008     | d/3661/08        | H4N6         | MF680290- MF680297                 |
| 04.11.2008     | A/duck/Moscow/3641/2008     | d/3641/08        | H11N9        | MT773558- MT773564<br>GU991377     |
| 26.08.2009     | A/duck/Moscow/3740/2009     | d/3740/09        | H4N6         | MF422098- MF422104                 |
| 04.09.2009     | A/duck/Moscow/3799/2009     | d/3799/09        | H4N6         | MF422105- MF422111                 |
| 30.09.2009     | A/duck/Moscow/3735/2009     | d/3735/09        | H4N6         | MF422091- MF422097                 |
| 04.09.2009     | A/duck/Moscow/3806/2009     | d/3806/09        | H3N8         | MN692266- MN692273                 |
| 21.09.2009     | A/duck/Moscow/3720/2009     | d/3720/09        | H6N2         | MW269601- MW269607<br>CY120771     |
| 26.11.2010     | A/duck/Moscow/4203/2010     | d/4203/10        | H3N8         | MN700132- MN700139                 |
| 16.10.2010     | A/duck/Moscow/4238/2010     | d/4238/10        | H3N6         | MN700140- MN700147                 |
| 13.11.2010     | A/duck/Moscow/4242/2010     | d/4242/10        | H3N8         | MN700148- MN700155                 |
| 22.10.2010     | A/duck/Moscow/4298/2010     | d/4298/10        | H3N8         | MN700156- MN700163                 |
| 20.09.2010     | A/duck/Moscow/4031/2010     | d/4031/10        | H6N2         | MT773263- MT773270                 |
| 16.11.2010     | A/duck/Moscow/4182/2010     | d/4182/10        | H5N3         | KF885672- KF885679                 |
| 27.09.2011     | A/duck/Moscow/4494/2011     | d/4494/11        | H3N8         | MN759696- MN759703                 |
| 21.10.2011     | A/duck/Moscow/4681/2011     | d/4681/11        | H3N8         | MN759704- MN759711                 |
| 04.10.2011     | A/duck/Moscow/4518/2011     | d/4518/11        | H4N6         | MF673524- MF673531                 |
| 04.10.2011     | A/duck/Moscow/4524/2011 mix | d/4524/11<br>mix | H3N2<br>H3N8 | MN692213- MN692221<br>MN692219(N8) |
| 04.10.2011     | A/duck/Moscow/4528/2011     | d/4528/11        | H4N6         | MF673532- MF673539                 |
| 19.10.2011     | A/duck/Moscow/4641/2011     | d/4641/11        | H4N6         | MF422112- MF422119                 |
| 19.10.2011     | A/duck/Moscow/4643/2011     | d/4643/11        | H4N6         | KX509943- KX509950                 |
| 11.10.2011     | A/duck/Moscow/4652/2011     | d/4652/11        | H4N6         | KX518711- KX518718                 |
| 11.10.2011     | A/duck/Moscow/4661/2011     | d/4661/11        | H3N8         | MN759712- MN759719                 |
| 10.10.2012     | A/duck/Moscow/4771/2012     | d/4771/12        | H4N6         | MF673540- MF673547                 |
| 17.10.2012     | A/duck/Moscow/4843/2012     | d/4843/12        | H4N6         | MF673548- MF673555                 |
| 17.10.2012     | A/duck/Moscow/4788/2012     | d/4788/12        | H3N8         | MT773383- MT773390                 |
| 31.10.2012     | A/duck/Moscow/4780/2012     | d/4780/12        | H3N8         | MT773360- MT773367                 |
| 31.10.2012     | A/duck/Moscow/4781/2012     | d/4781/12        | H4N6         | KX530510- KX530517                 |
| 19.11.2013     | A/duck/Moscow/4971/2013     | d/4971/13        | H5N3         | MN588283- MN588290                 |
| 26.11.2013     | A/duck/Moscow/4952/2013     | d/4952/13        | H5N3         | MN588194- MN588201                 |
| 26.11.2013     | A/duck/Moscow/4970/2013     | d/4970/13        | H1N1         | MN400364- MN400371                 |
| 26.10.2014     | A/duck/Moscow/5037/2014     | d/5037/14        | H3N8         | MT773420- MT773427                 |
| 04.09.2015     | A/duck/Moscow/5163/2015     | d/5163/15        | H3N6         | OP132933- OP132940                 |
| 16.09.2015     | A/duck/Moscow/5169/2015     | d/5169/15        | H3N6         | OP133010- OP133017                 |
| 07.09.2015     | A/duck/Moscow/5171/2015     | d/5171/15        | H3N6         | OP133377- OP133384                 |
| 07.09.2015     | A/duck/Moscow/5172/2015     | d/5172/15        | H3N6         | OP133387- OP133394                 |
| 17.10.2018     | A/duck/Moscow/5586/2018     | d/5586/18        | H1N2         | MN435632- MN435639                 |
| 01.11.2018     | A/duck/Moscow/5662/2018     | d/5662/18        | H1N2         | MN588291- MN588298                 |
| 15.10.2019     | A/duck/Moscow/5743/2019     | d/5743/19        | H1N1         | MW186793- MW186800                 |
| 15.10.2019     | A/duck/Moscow/5744/2019     | d/5744/19        | H1N1         | MW186801- MW186808                 |
| 21.10.2019     | A/duck/Moscow/5712/2019     | d/5712/19        | H11N6        | MW186784- MW186791                 |
| 06.10.2021     | A/duck/Moscow/5881/2021     | d/5881/21        | H3N2         | OP133621- OP133628                 |
| 07.11.2021     | A/duck/Moscow/5897/2021     | d/5897/21        | H3N8         | OP136008- OP136015                 |
| 07.11.2021     | A/duck/Moscow/5908/2021     | d/5908/21        | H3N8         | OP135948- OP135955                 |
