# Supplementary material for: Evolutionary Dynamics of Avian Influenza Viruses Isolated from Wild Birds in Moscow
Source: MDPI journal article supplement (doi:10.3390/ijms24033020), 2023-02-03
Supplement: s1 [file s1]

**Figure S1.** Evolutionary tree of the HA H4 gene of Eurasian viruses;  
**Figure S2.** Evolutionary tree of the NA N6 gene of Eurasian viruses;  
**Figure S3.** Evolutionary tree of the PB2 gene of Eurasian H4N6 viruses;  
**Figure S4.** Evolutionary tree of the HA H4 gene of American viruses;  
**Figure S5.** Evolutionary tree of the NA N6 gene of American viruses;  
**Figure S6.** Evolutionary tree of the PB2 gene of American H4N6 viruses;  
**Figure S7.** Evolutionary tree of the HA H3 gene of Eurasian viruses;  
**Figure S8.** Evolutionary tree of the NA N8 gene of Eurasian viruses;  
**Figure S9.** Evolutionary tree of the PB2 HA gene of Eurasian H3 viruses.
