# Supplementary material for: Evolutionary Dynamics of Avian Influenza Viruses Isolated from Wild Birds in Moscow
Source: Int J Mol Sci. 2023 Feb 3;24(3):3020. doi: 10.3390/ijms24033020 (PMC9917497; doi:10.3390/ijms24033020)
Supplement: Supplementary file 1 [file ijms-24-03020-s001.zip]

Archive with 11 entries (11 files):
- Figure captions.pdf
- Figure S1 Evolutionary tree of the HA H4 gene of Eurasian viruses.pdf
- Figure S2 Evolutionary tree of the NA N6 gene of Eurasian viruses.pdf
- Figure S3 Evolutionary tree of the PB2 gene of Eurasian H4N6 viruses.pdf
- Figure S4 Evolutionary tree of the HA H4 gene of American viruses.pdf
- Figure S5 Evolutionary tree of the NA N6 gene of American viruses.pdf
- Figure S6 Evolutionary tree of the PB2 gene of American H4N6 viruses.pdf
- Figure S7 Evolutionary tree of the HA H3 gene of Eurasian viruses.pdf
- Figure S8 Evolutionary tree of the NA N8 gene of Eurasian viruses.pdf
- Figure S9 Evolutionary tree of the PB2 HA gene of Eurasian H3 viruses.pdf
- Table S1.pdf
