# Supplementary figures and images for: Evolutionary Dynamics of Avian Influenza Viruses Isolated from Wild Birds in Moscow
Source: MDPI journal article supplement (doi:10.3390/ijms24033020), 2023-02-03

Tree scale: 0.1

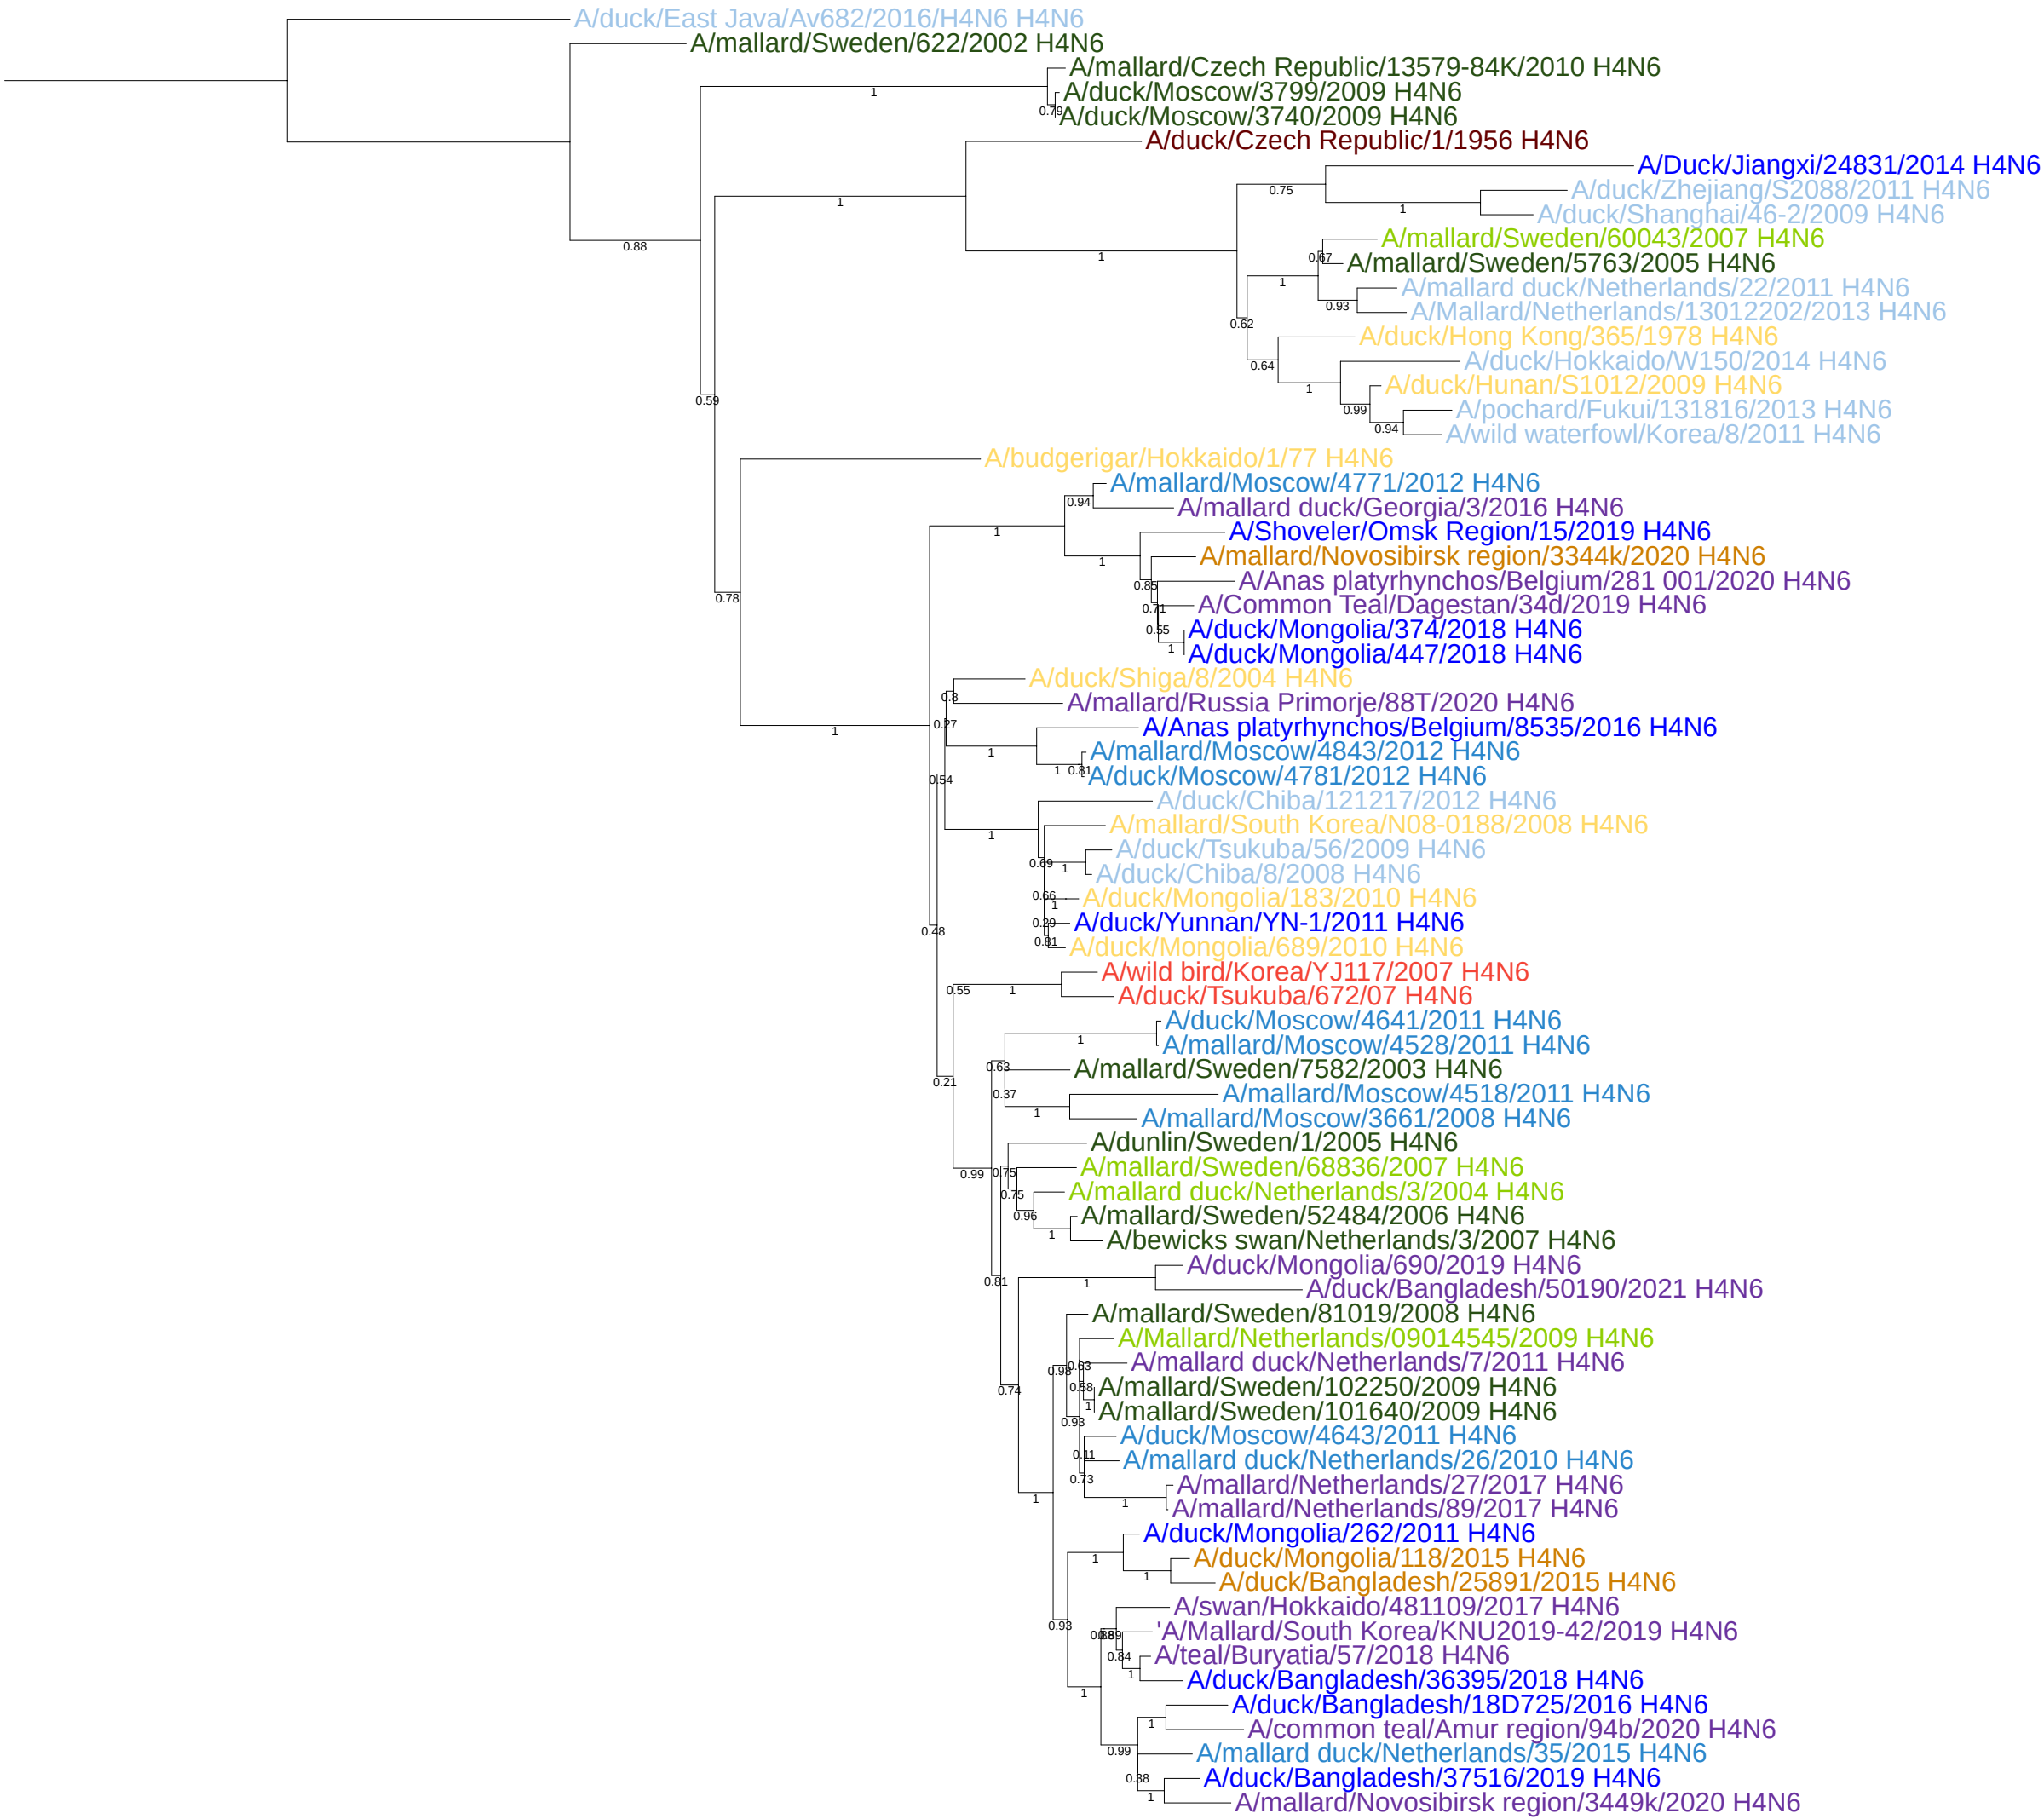

Supplement: s1 [file s1]

Tree scale: 0.1

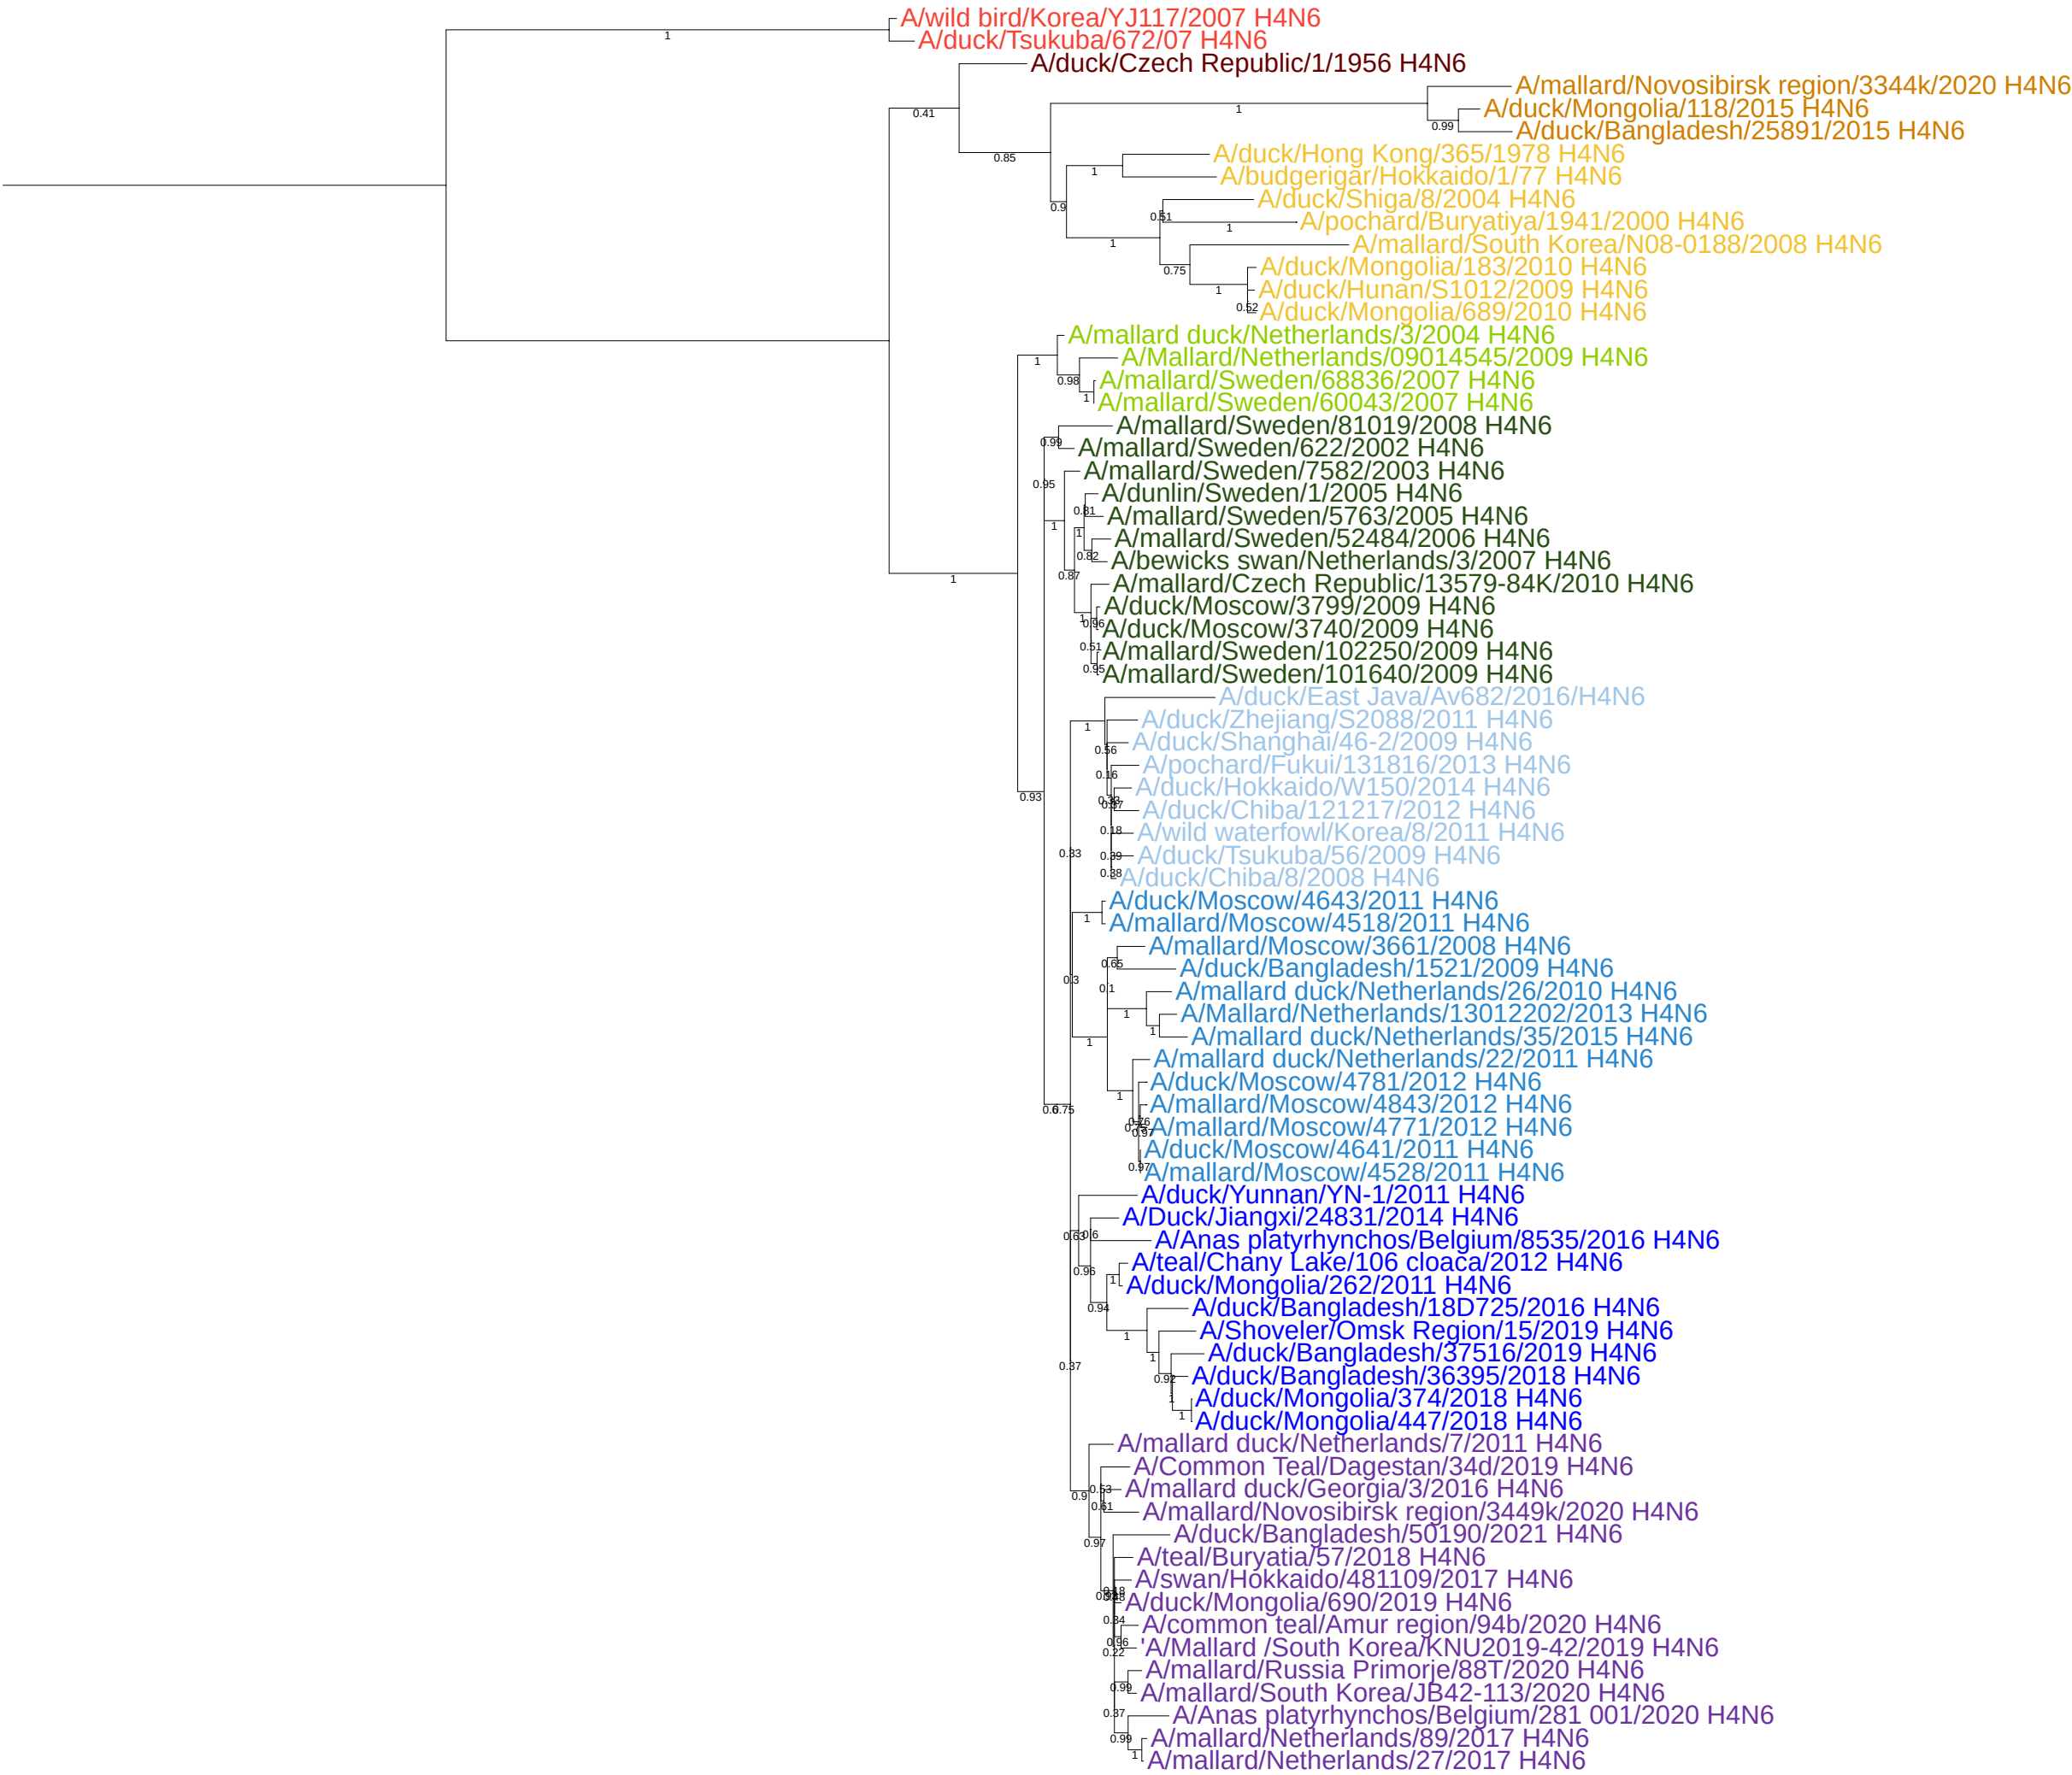

Supplement: s1 [file s1]

Tree scale: 0.1

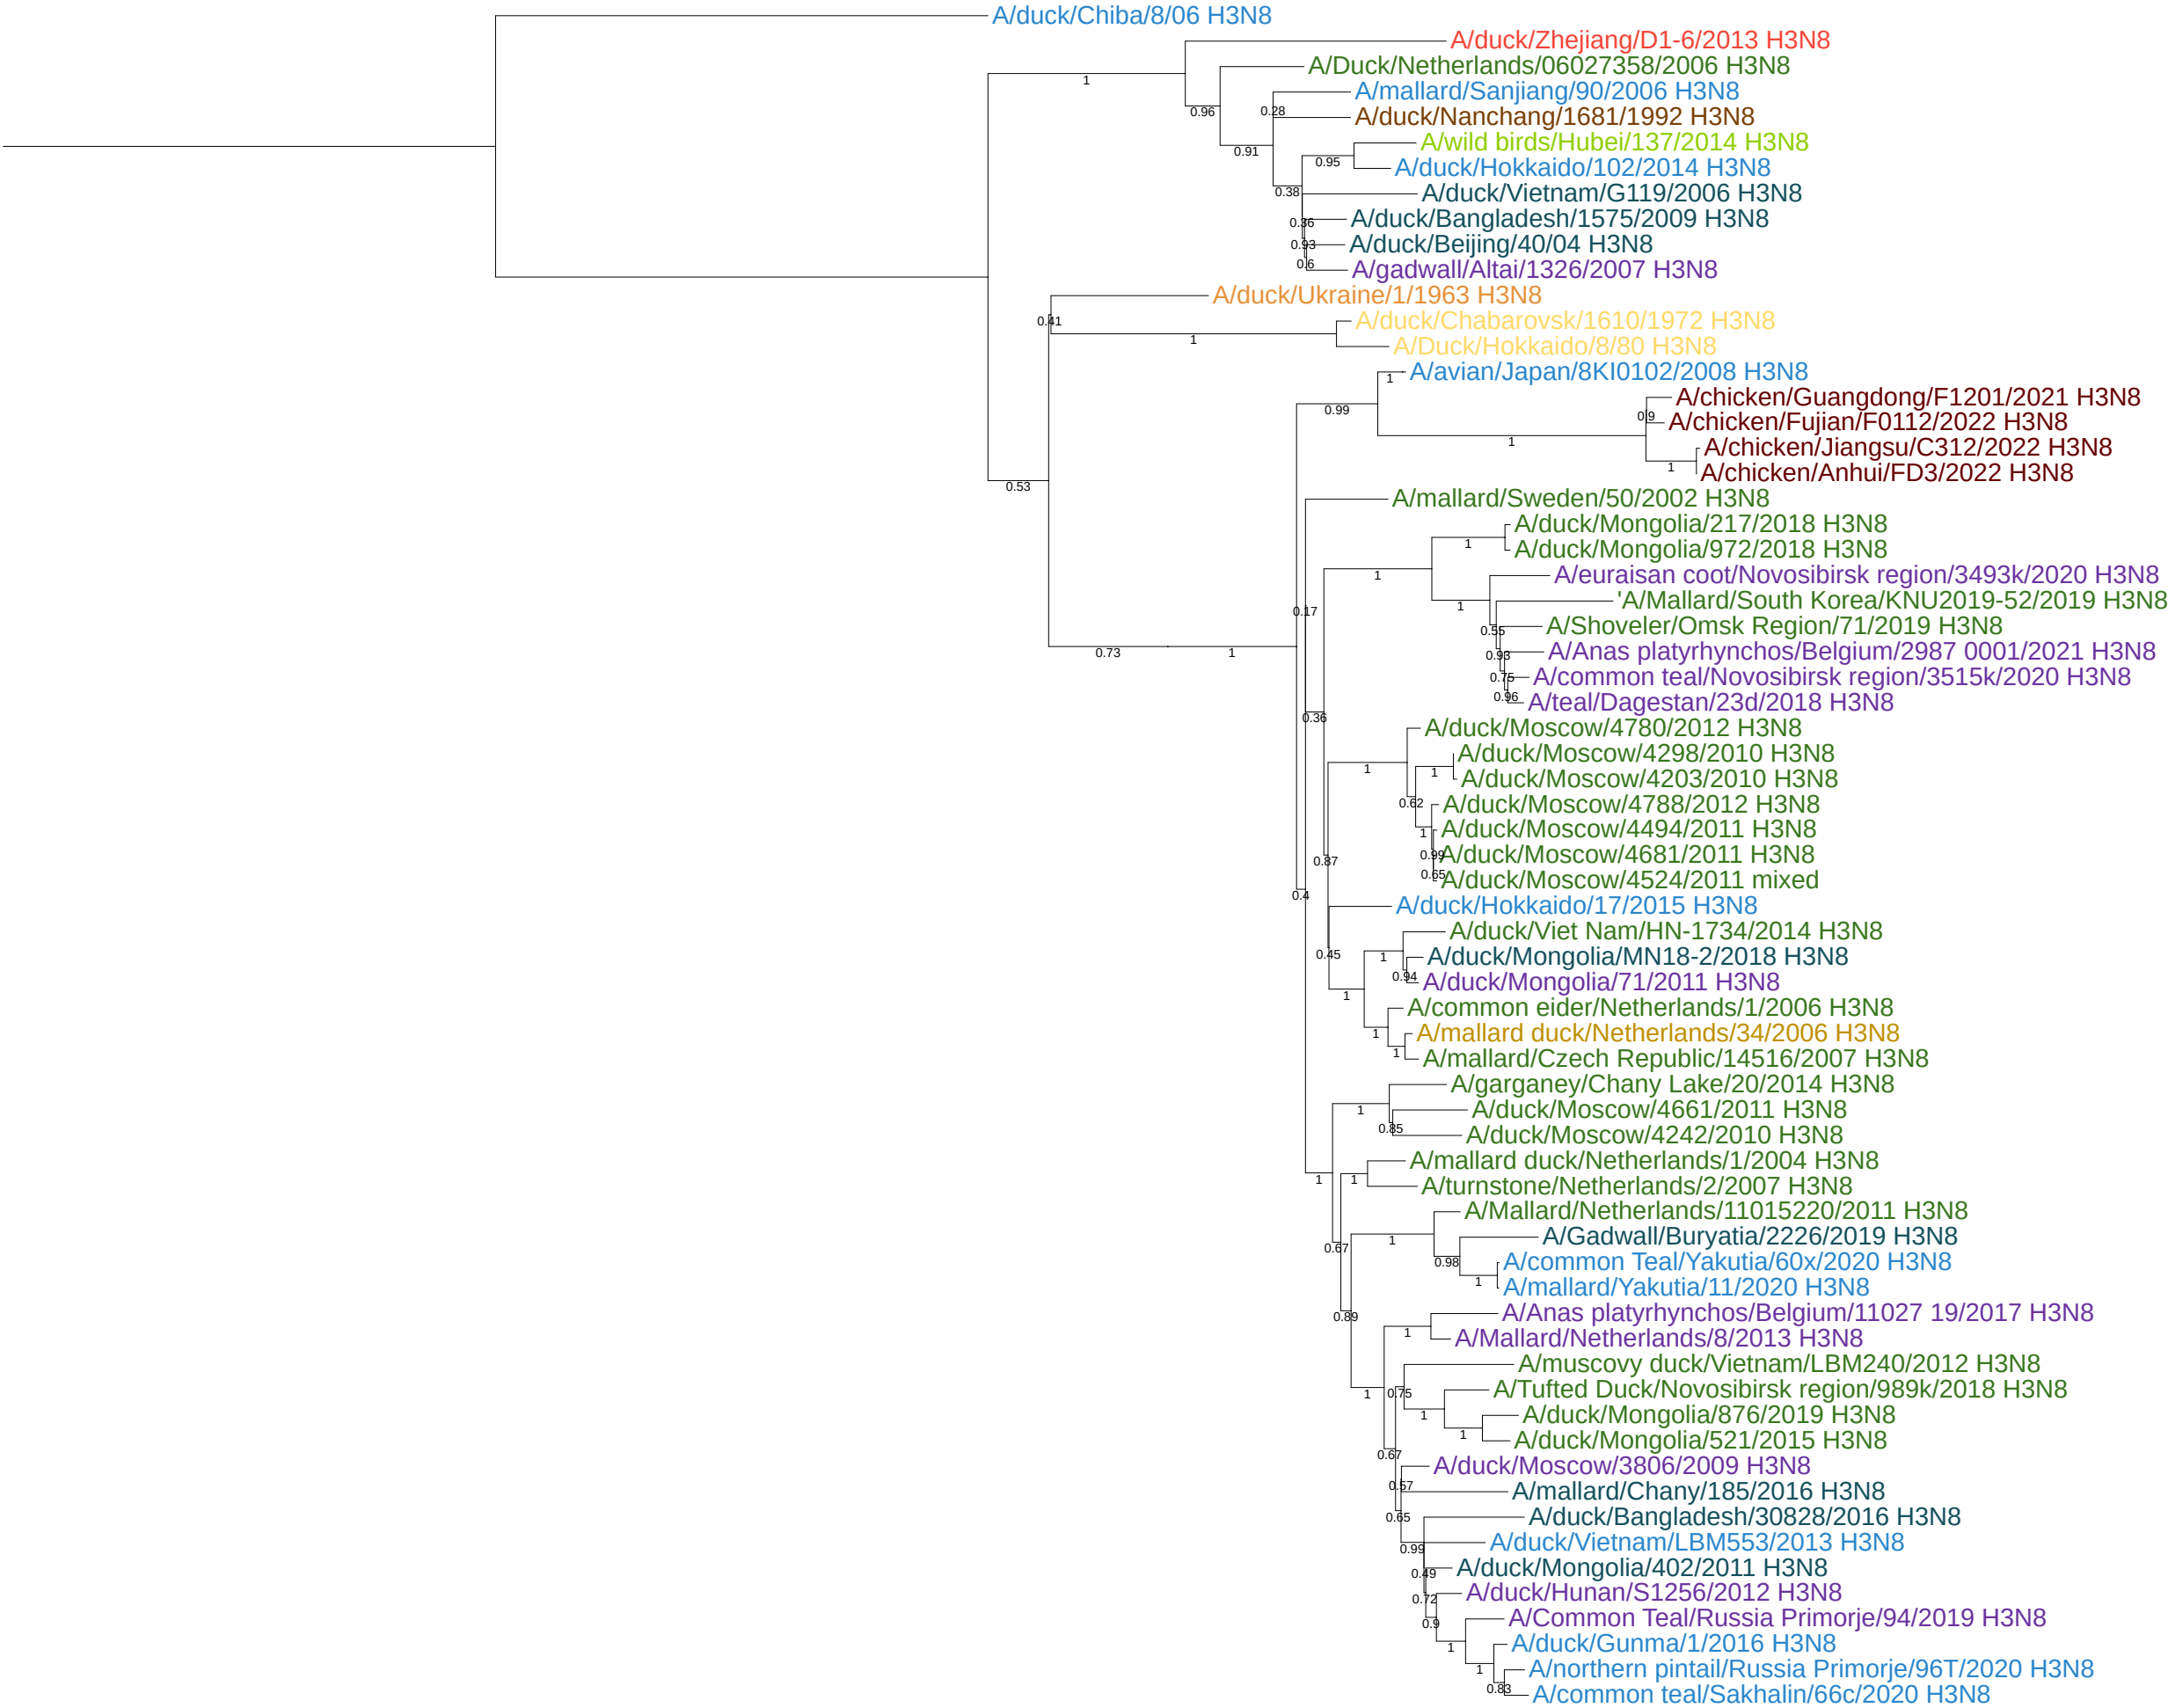

Supplement: s1 [file s1]

Tree scale: 0.1

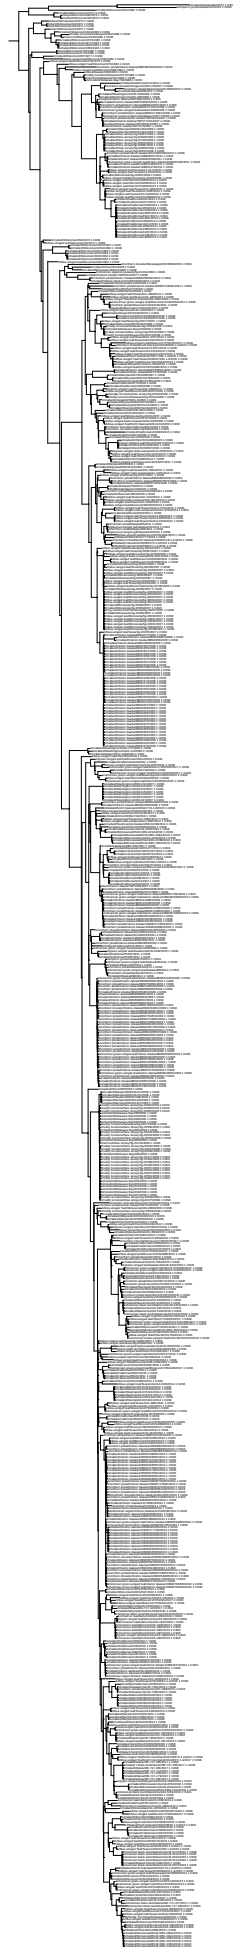

Supplement: s1 [file s1]

Tree scale: 100

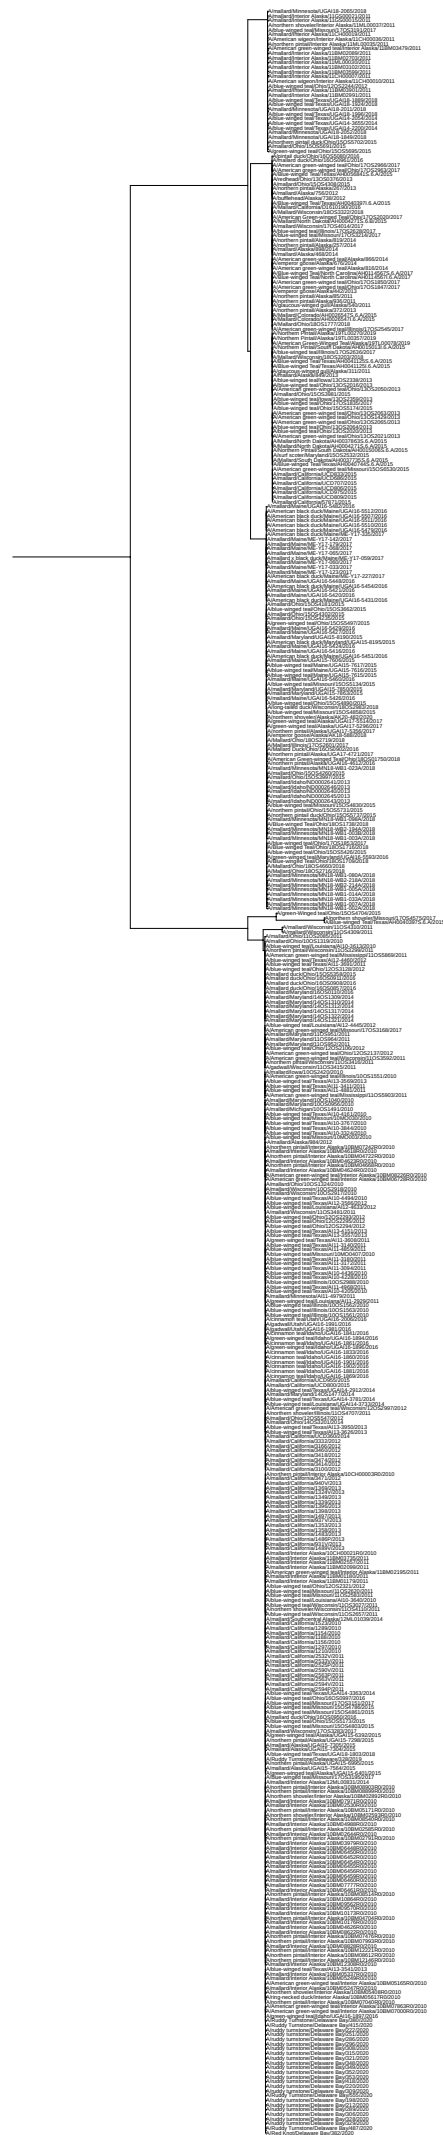

Supplement: s1 [file s1]

Tree scale: 0.1

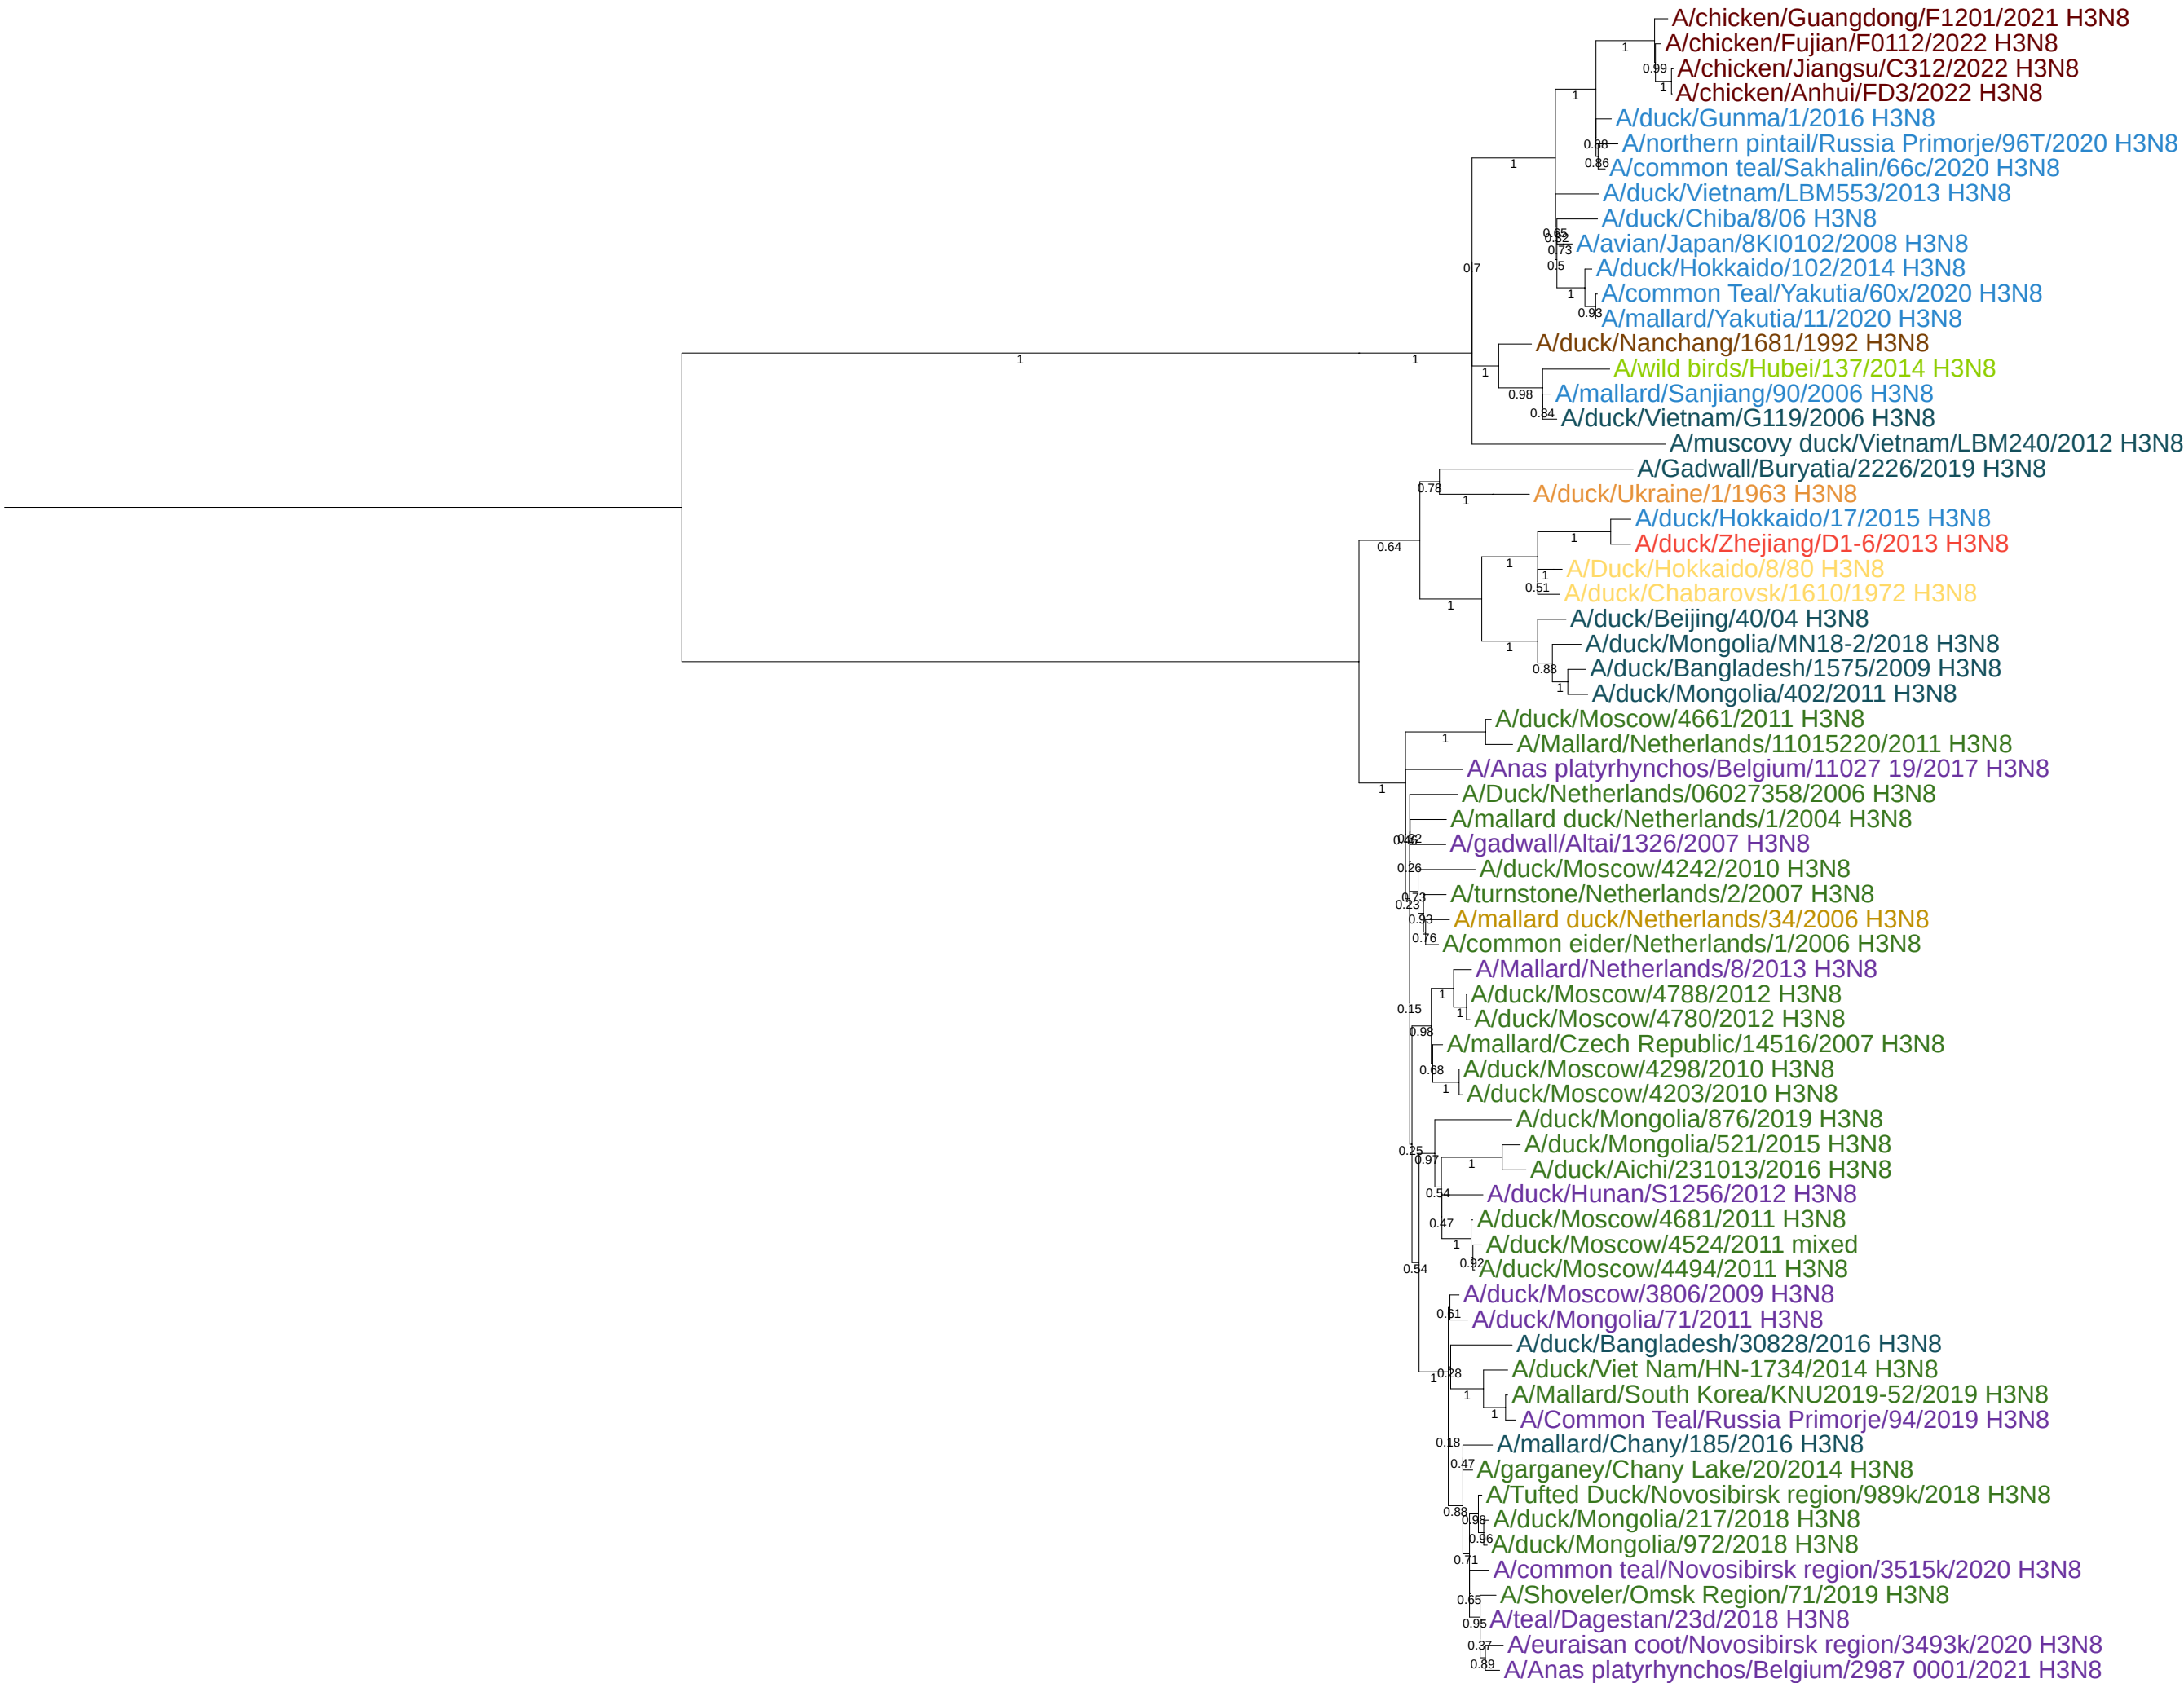

Supplement: s1 [file s1]

Tree scale: 100

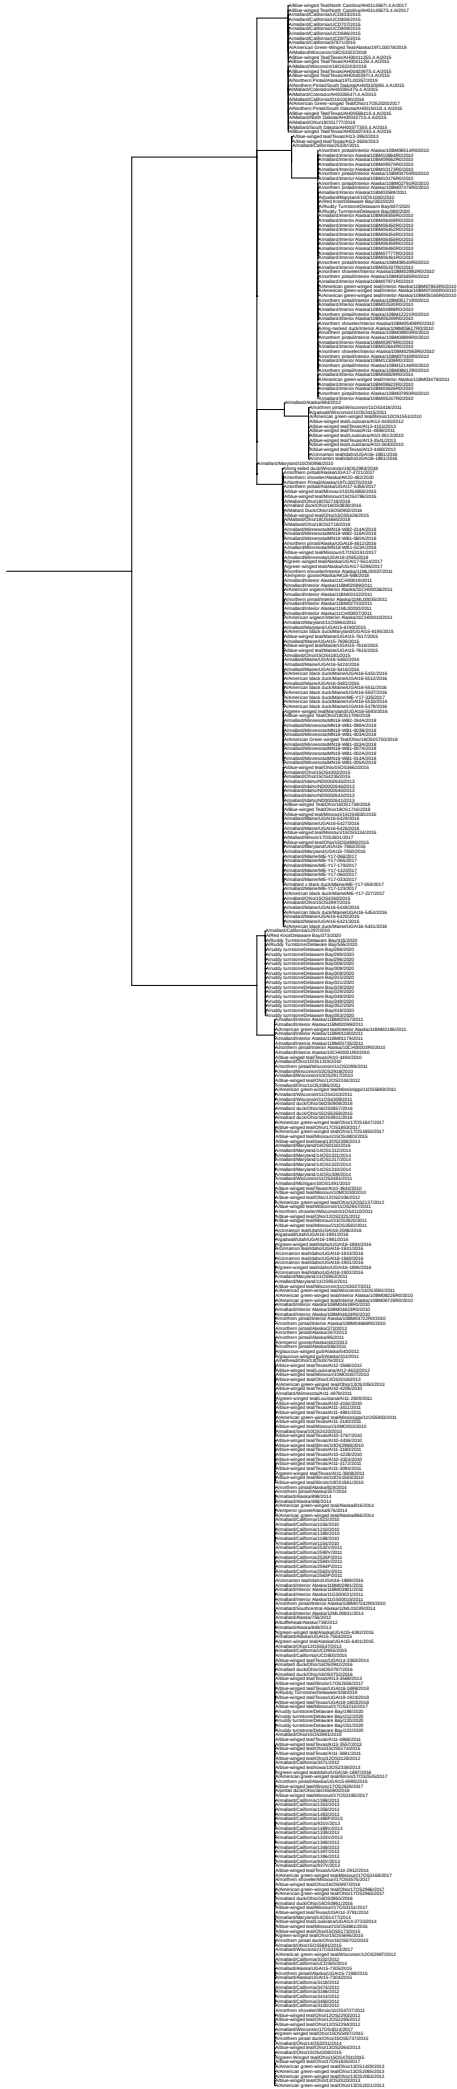

Supplement: s1 [file s1]

Tree scale: 0.01

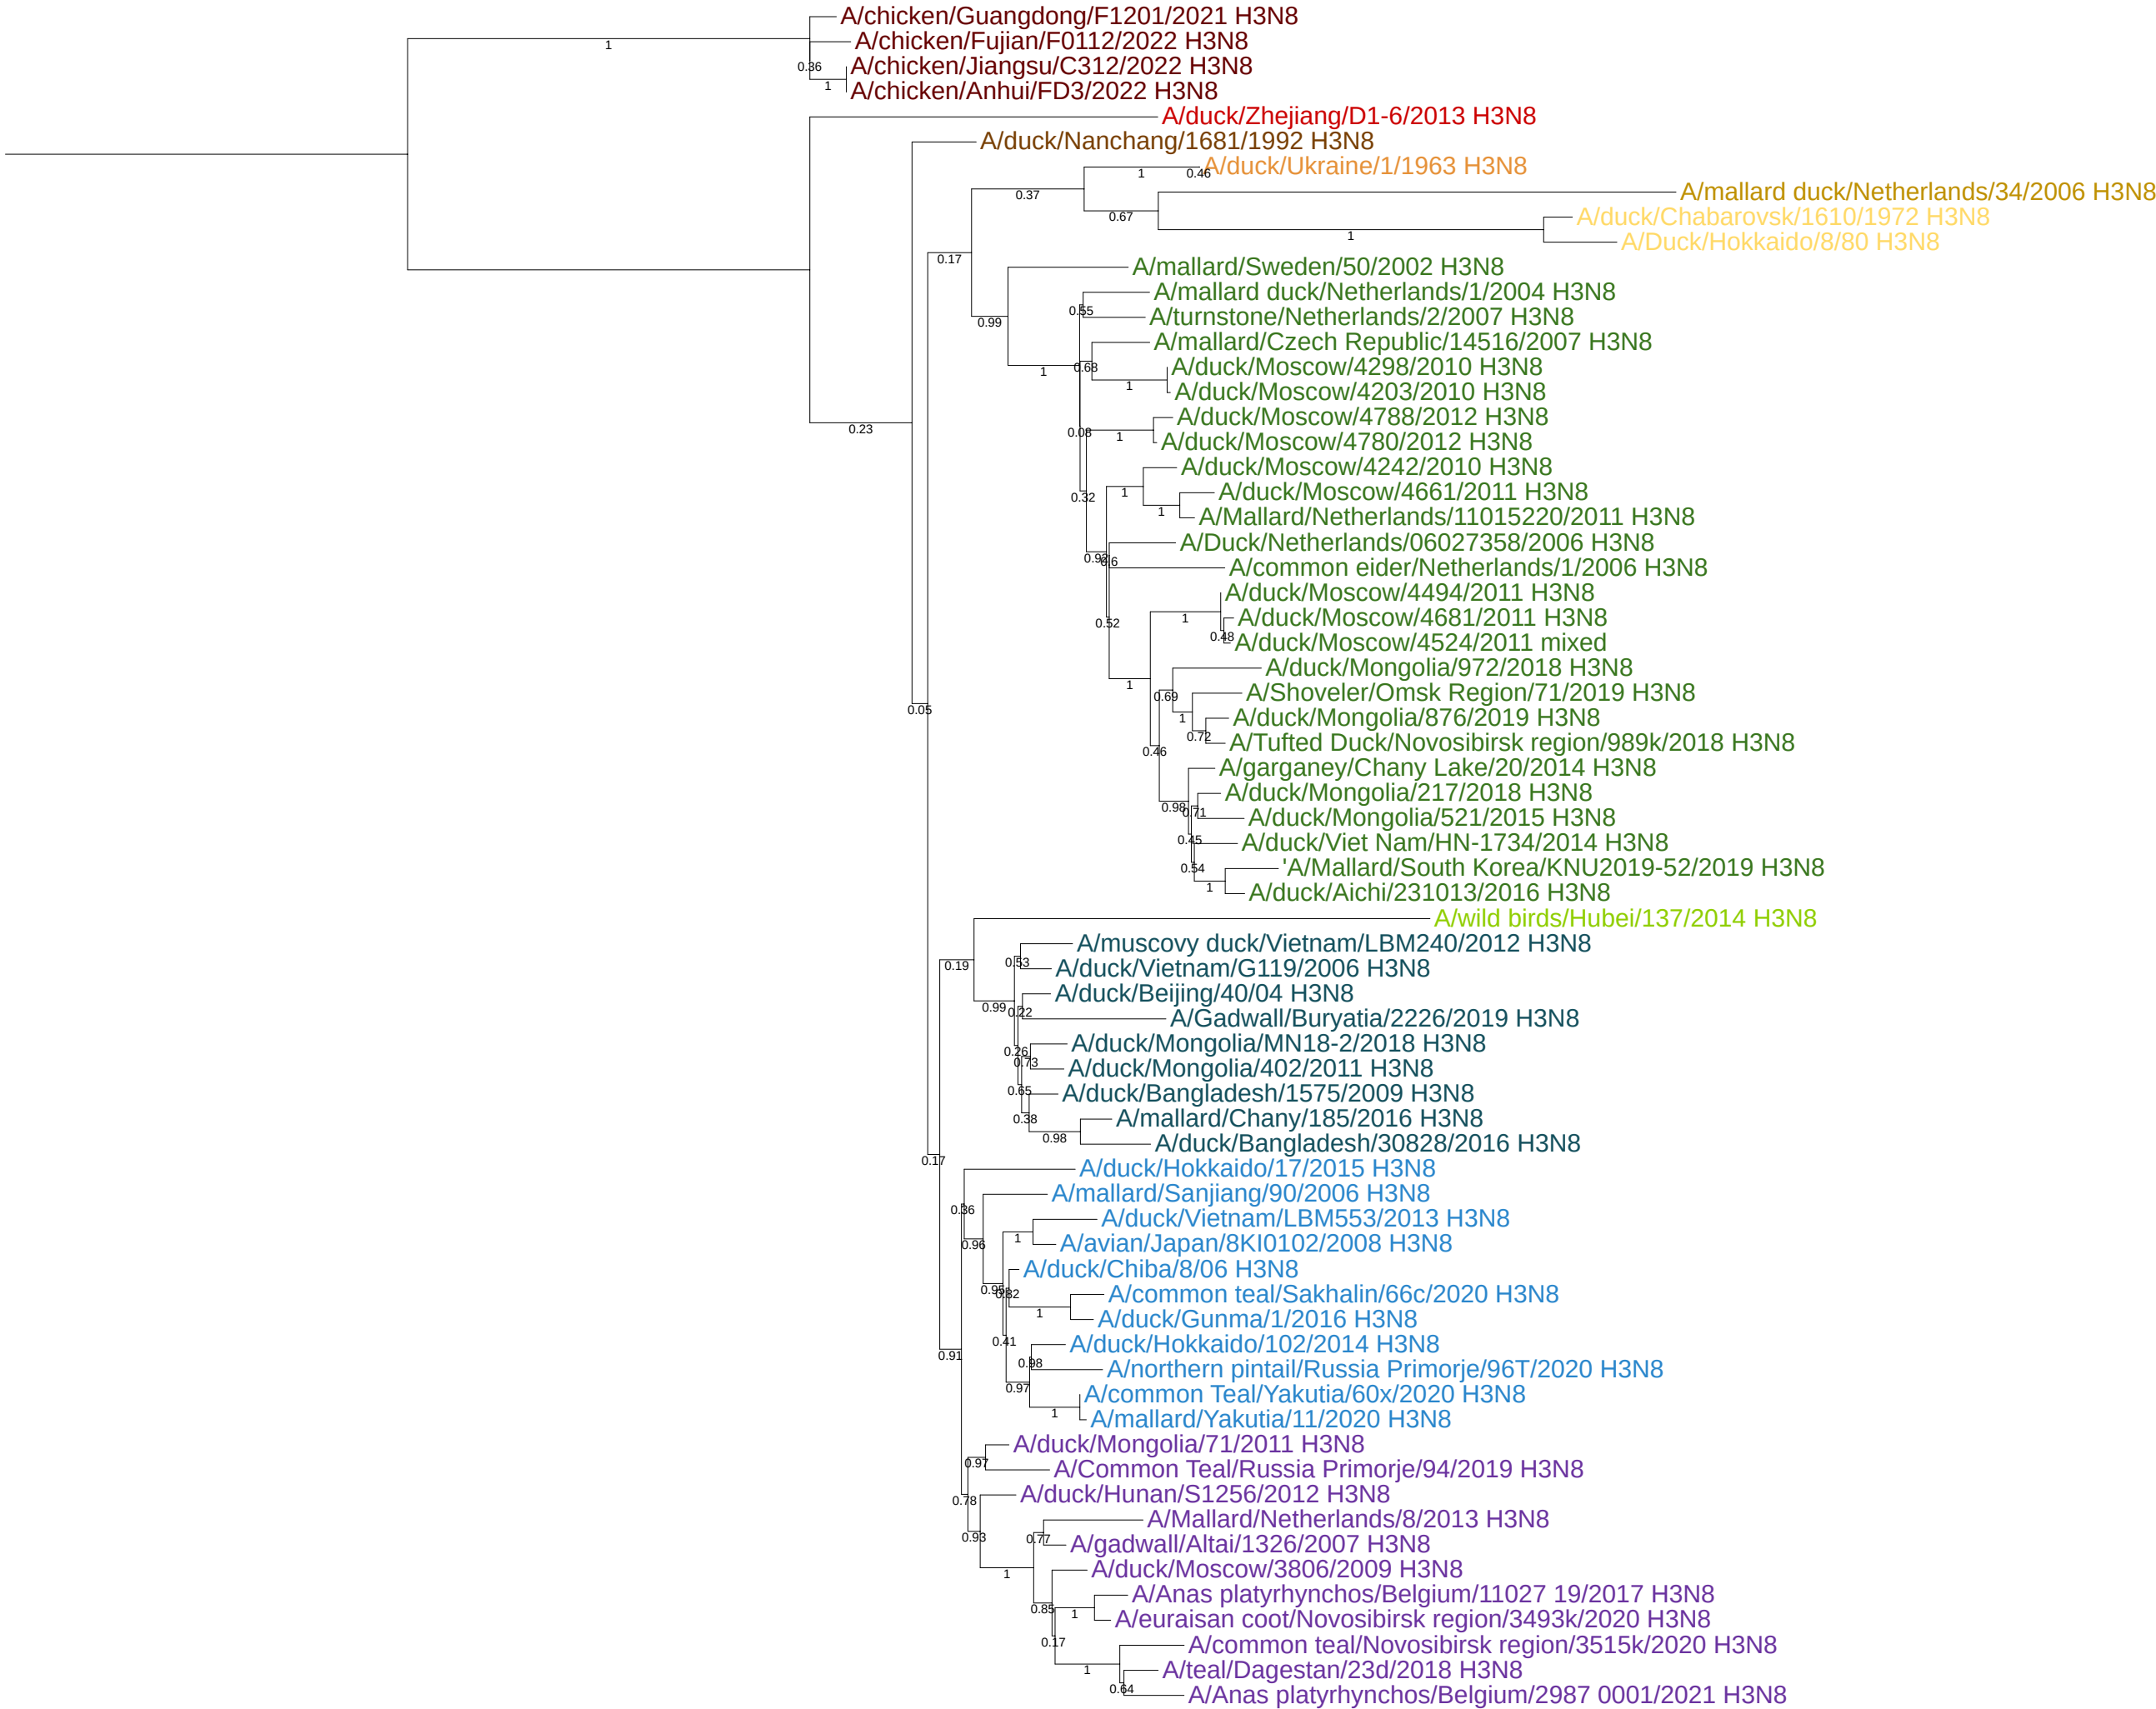

Supplement: s1 [file s1]
